# Supplementary material
Source: publisher figshare collection journal article supplement (https://acs.figshare.com/ndownloader/files/30480257)
Supplement: Supplementary file 1 [file 30480257]

# Characterizing the Aging of Alphasense NO<sub>2</sub> Sensors in Long-term Field Deployments

Jiayu Li<sup>1,2</sup>, Aliaksei Hauryliuk<sup>1</sup>, Carl Malings<sup>1,3,4,5</sup>, S. Rose Eilenberg<sup>1</sup>, R. Subramanian<sup>1,3,4</sup>, Albert A. Presto<sup>1,\*</sup>

<sup>1</sup>Center for Atmospheric Particle Studies (CAPS)  
Carnegie Mellon University  
Pittsburgh, PA 15213

<sup>2</sup>Air and Aerosol Sensing Group (AASG)  
University of Minnesota, Twin Cities  
Minnesota, MN 55108

<sup>3</sup>OSU-EFLUVE - Observatoire Sciences de l'Univers-Enveloppes Fluides de la  
Ville à l'Exobiologie, Université Paris-Est-Créteil, CNRS UMS 3563  
Ecole Nationale des Ponts et Chaussées, Université de Paris, France

<sup>4</sup>Laboratoire Interuniversitaire des Systèmes Atmosphériques, UMR 7583, CNRS  
Université Paris-Est-Créteil, Université de Paris, Institut Pierre Simon Laplace  
Créteil, France

<sup>5</sup>NASA Postdoctoral Program Fellow  
Goddard Space Flight Center  
Greenbelt, MD 20771

\*Corresponding author: Albert A. Presto  
Email: [apresto@andrew.cmu.edu](mailto:apresto@andrew.cmu.edu)  
Phone: 412-721-5203

## **Table of Contents**

**1. Information of reference sites**

**2. Limit of blank as a function of sensor age**

## 1. Information of reference sites

The ACHD Lawrenceville and the CMU campus site are two collocation sites where reference instruments can provide accurate NO<sub>2</sub> concentrations. RAMP monitors were brought back to these two locations periodically for evaluating the data quality of NO<sub>2</sub> sensors. The minimum, mean, and maximum NO<sub>2</sub> concentrations in 2019 at the ACHD Lawrenceville are 0, 11.8, and 100.9 ppb, respectively. The minimum, mean, and maximum NO<sub>2</sub> concentrations in the 2017 collocation campaign at the CMU campus site from May to November were 0, 6.2, and 32.2ppb, respectively.

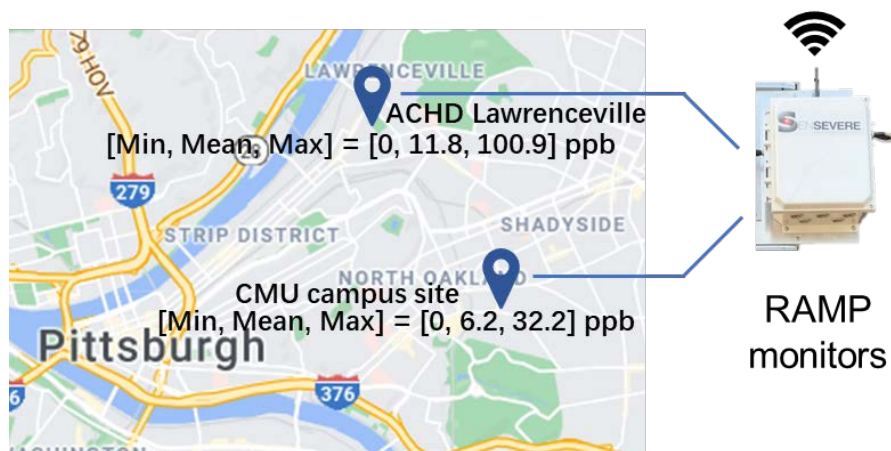

**Figure S1.** Locations and annual NO<sub>2</sub> concentrations of two reference monitoring sites – ACHD Lawrenceville and CMU campus site.

## 2. Limit of blank as a function of sensor age

The limit of blank (LOB) of the Alphasense NO<sub>2</sub> sensors was calculated to evaluate sensor applicability for atmospheric sampling. LOBs were calculated based on Eq. (S1).<sup>1</sup> LOB represents the sensor response to near-zero concentration samples and can be further used to calculate the limit of detection (LOD) and limit of quantification (LOQ).<sup>1-2</sup>

$$LOB_{i,t} = mean_{blank,i,t} + 1.645(SD_{blank,i,t}) \quad (S1)$$

Since ambient NO<sub>2</sub> rarely reaches 0 ppb, we revised the definition of “blank samples” as reference NO<sub>2</sub> concentrations between 0-2 ppb. Such an expanded range increased data available for LOB calculations. LOBs were calculated for each individual sensor  $i$ , at collocation period  $t$ , based on blank samples with a 15-minute sampling interval. The concentration average of blank samples ( $mean_{blank,i,t}$ ) and the standard deviation of blank samples ( $SD_{blank,i,t}$ ) were calculated based on NO<sub>2</sub> concentrations (ppb) derived from sensor raw signals (mV).

Two methods were used to convert sensor raw signals to NO<sub>2</sub> concentrations, the linear regression model and the baseline random forest (RF) model. For the linear regression model, only the original calibration model (based on the first collocation if it happened within 200 days of unpacking, with  $R^2 > 0.8$ ) was used to calculate NO<sub>2</sub> concentrations from the rest of the collocation data. We also want to show the improvement in sensor performance if we regularly collocate sensors and calibrate them with advanced algorithms. Therefore, for the RF model, an individual calibration model was trained for each collocation dataset to calculate NO<sub>2</sub> concentrations from sensor raw signals, similar to individual calibration models reported in Malings et al. 2019.<sup>3</sup> LOBs calculated from RF models represent sensors that were regularly collocated over their deployment

lifetime and calibrated with advanced algorithms. If a sensor does not have the qualified original calibration model, original calibration models of sensors from the same batch are averaged and applied to the collocation data, which is similar to the generalized calibration models reported in Malings et al. 2019. LOBs calculated from linear regressions represent that sensors were only collocated once or not collocated, and their results were calibrated with a simple algorithm.

Fig. S2 shows the LOB of each collocation dataset inverted from both the linear regression and the baseline RF model, shown as solid dots and hollow dots, respectively. Dots are colored based on batch numbers. The two dotted lines are the 1st and 3rd quartile of hourly NO<sub>2</sub> concentrations at ACHD Lawrenceville. The dashed line is the annual average NO<sub>2</sub> concentration at ACHD Lawrenceville.

As expected, LOBs inverted from the linear regression model increase over deployment time. This is indicative of the worsening data quality due to sensor aging described above. After approximately 200 to 400 days, the LOBs from the linear regression exceed the 3rd quartile of NO<sub>2</sub> concentrations at ACHD Lawrenceville. High LOBs show that these sensors cannot guarantee reliable data quality in the atmospheric sampling after long-term field deployment if they are not frequently collocated and calibrated. Thus, frequent collocation and calibration are essential to ensure reliable data quality in long-term deployment. Future research should investigate strategies to calibrate sensors with regional air quality data or satellite data instead of labor-intensive physical collocation.<sup>4</sup>

LOBs inverted from baseline RF models are stable around the 1st quartile of hourly NO<sub>2</sub> concentrations at ACHD Lawrenceville. These LOBs are much lower than those inverted from linear regressions and remain low even after very long deployments (>400 days). As previously

shown by Zimmerman et al. (2018), the random forest model for  $\text{NO}_2$  can be influenced by  $\text{NO}_2$ , CO, T, and RH, (these results were for relatively newer sensors);<sup>5</sup> in a city, the major  $\text{NO}_2$  source (vehicular traffic) also co-emits CO. Thus, even though the sensors nominally perform well, the output of the RF model is not indicative of the actual sensor performance. The RF model can provide reasonable results even if the raw signals from these sensors have almost no correlation with ambient  $\text{NO}_2$  concentrations.

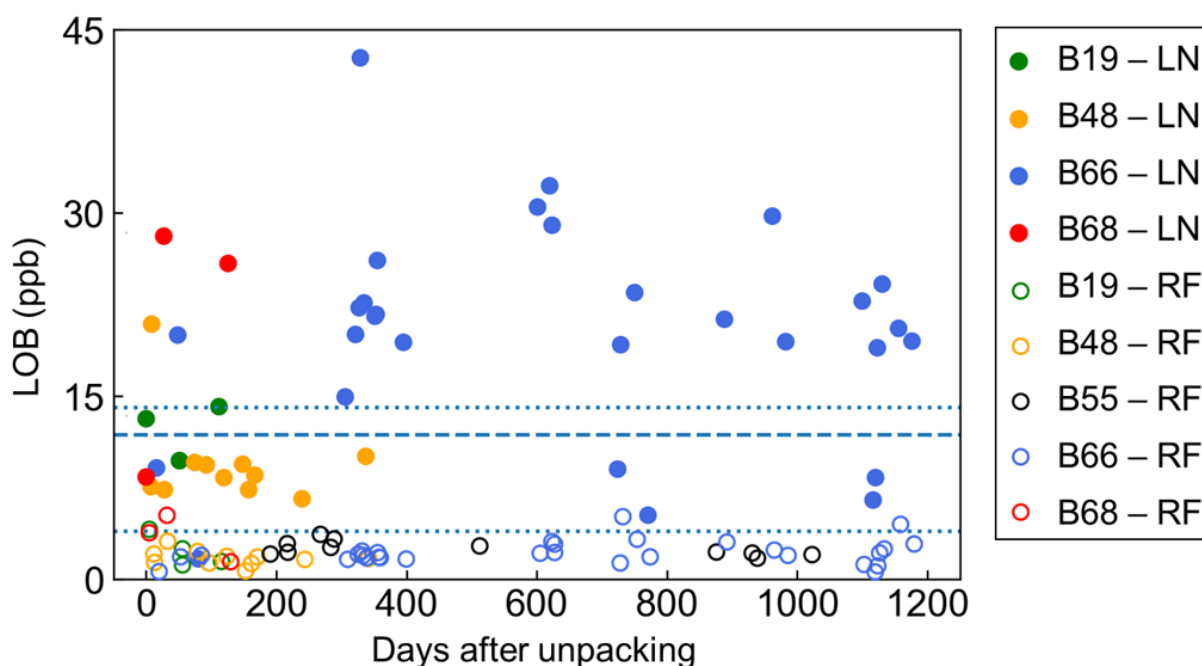

**Figure S2.** Solid dots and hollow dots are the limit of blanks (LOBs) calculated from linear regressions and baseline RF models. The dotted lines are the 1<sup>st</sup> and 3<sup>rd</sup> quartile of ACHD  $\text{NO}_2$  concentrations, and the dashed line is the mean of their annual average. Sensor aging gradually increases the detection threshold, and regular collocation and advanced algorithms can ease the aging issue.

## References

1. Armbruster, D. A.; Pry, T., Limit of blank, limit of detection and limit of quantitation. *The clinical biochemist reviews* **2008**, 29 (Suppl 1), S49.
2. Shrivastava, A.; Gupta, V. B., Methods for the determination of limit of detection and limit of quantitation of the analytical methods. *Chronicles of young scientists* **2011**, 2 (1), 21.
3. Malings, C.; Tanzer, R.; Hauryliuk, A.; Kumar, S. P.; Zimmerman, N.; Kara, L. B.; Presto, A. A.; Subramanian, R., Development of a general calibration model and long-term performance evaluation of low-cost sensors for air pollutant gas monitoring. *Atmospheric Measurement Techniques* **2019**, 12 (2), 903-920.
4. (a) Malings, C.; Westervelt, D. M.; Hauryliuk, A.; Presto, A. A.; Grieshop, A.; Bittner, A.; Beekmann, M.; Subramanian, R., Application of low-cost fine particulate mass monitors to convert satellite aerosol optical depth to surface concentrations in North America and Africa. *Atmospheric Measurement Techniques* **2020**, 13 (7), 3873-3892; (b) Li, J.; Zhang, H.; Chao, C.-Y.; Chien, C.-H.; Wu, C.-Y.; Luo, C. H.; Chen, L.-J.; Biswas, P., Integrating low-cost air quality sensor networks with fixed and satellite monitoring systems to study ground-level PM<sub>2.5</sub>. *Atmospheric Environment* **2020**, 223, 117293. DOI: 10.1016/j.atmosenv.2020.117293; (c) Gupta, P.; Doraiswamy, P.; Levy, R.; Pikel'naya, O.; Maibach, J.; Feenstra, B.; Polidori, A.; Kiros, F.; Mills, K., Impact of California fires on local and regional air quality: the role of a low-cost sensor network and satellite observations. *GeoHealth* **2018**, 2 (6), 172-181.
5. Zimmerman, N.; Presto, A. A.; Kumar, S. P.; Gu, J.; Hauryliuk, A.; Robinson, E. S.; Robinson, A. L.; Subramanian, R., A machine learning calibration model using random forests to improve sensor performance for lower-cost air quality monitoring. *Atmospheric Measurement Techniques* **2018**, 11 (1), 291-313.
